# Supplementary material for: Integrative experimental/computational approach establishes active cellular protrusion as the primary driving force of phagocytic spreading by immune cells
Source: PubMed Central journal article supplement (PMC9455874; doi:10.1371/journal.pcbi.1009937), 2022-08-26
Supplement: pcbi.1009937.s007.pdf [file pcbi.1009937.s007.pdf]

## S1 Table. Modeling parameters

| Parameter           | Description                                                    | Value                                       | Notes                                                                                                                                         |
|---------------------|----------------------------------------------------------------|---------------------------------------------|-----------------------------------------------------------------------------------------------------------------------------------------------|
| $\tau_0$            | Resting cortical tension                                       | 0.01 mN/m                                   | Matches experimental value used by Herant et al [1]                                                                                           |
| $\tau_{max}$        | Maximum cortical tension                                       | ~1 mN/m (see constitutive relation)         | In a reasonable range for high tensions measured during neutrophil phagocytosis [2, 3]                                                        |
| $\mu$               | Effective cytoplasmic viscosity                                | 200 Pa-s (passive)<br>1,660 Pa-s (active)   | Matches experimentally measured values [4, 5]                                                                                                 |
| $\kappa_b$          | Effective membrane bending modulus                             | $1 \times 10^{-18}$ J                       | Matches experimentally measured values [6], much higher than values for RBCs or vesicles due to the neutrophil cortex                         |
| $R_0$               | Initial cell radius                                            | 4.25 $\mu\text{m}$                          | Radius of a human neutrophil                                                                                                                  |
| $\sigma_0$          | Adhesion stress constant                                       | 370 Pa                                      | Together with the ligand density, this determines adhesion strength                                                                           |
| $\rho_{IgG,max}$    | Ligand density corresponding to 100% for Brownian Zipper model | 10,000 IgG/ $\mu\text{m}^2$                 | This density corresponds to about 600 $\mu\text{J}/\text{m}^2$ , which exceeds values derived from other cases of cell spreading [7]          |
| $D_0$               | Zero adhesion force distance                                   | 50 nm                                       | Relatively large distance required for mesoscopic model, as standard in other continuum models [8, 9]                                         |
| $\sigma_{prot,max}$ | Max. protrusion stress                                         | 3,500 Pa                                    | Actin filaments growing in parallel can achieve forces above 1 nN per $\mu\text{m}^2$ ( $> 1$ kPa) [10, 11]                                   |
| $s_0$               | Protrusive force range                                         | 0.8 $\mu\text{m}$                           | Controls how the protrusion stress decays along the membrane (Eq 8)                                                                           |
| $t_0$               | Characteristic time for decay of protrusion stress             | 66 s                                        | Used for discrete adhesion model (Eq 13)                                                                                                      |
| $k_B T$             | Energy scale factor                                            | $4.11 \times 10^{-21}$ J                    | Boltzmann constant ( $k_B$ ) times room temperature (298 K), sets scale for membrane fluctuations (Eq 12) and ligand-receptor binding energy. |
| $\rho_{FcyR}$       | FcyR density in the neutrophil membrane                        | 1,470 $\mu\text{m}^{-2}$                    | Receptor density used in discrete ligand + discrete receptor simulations shown in Fig 8B, explained in Appendix F                             |
| $D_{eff}$           | Effective FcyR diffusion coefficient                           | $1 \times 10^{-4}$ $\mu\text{m}^2/\text{s}$ | Chosen value explained in Appendix F                                                                                                          |

## References

1. Herant M, Lee CY, Dembo M, Heinrich V. Protrusive push versus enveloping embrace: computational model of phagocytosis predicts key regulatory role of cytoskeletal membrane anchors. *PLoS Comput Biol.* 2011;7(1):e1001068. doi: 10.1371/journal.pcbi.1001068. PubMed PMID: 21298079; PubMed Central PMCID: PMC3029235.
2. Lee CY, Thompson GR, 3rd, Hastey CJ, Hodge GC, Lunetta JM, Pappagianis D, et al. Coccidioides Endospores and Spherules Draw Strong Chemotactic, Adhesive, and Phagocytic Responses by Individual Human Neutrophils. *PLoS One.* 2015;10(6):e0129522. doi: 10.1371/journal.pone.0129522. PubMed PMID: 26070210; PubMed Central PMCID: PMC4466529.
3. Herant M, Heinrich V, Dembo M. Mechanics of neutrophil phagocytosis: behavior of the cortical tension. *J Cell Sci.* 2005;118(Pt 9):1789-97. doi: 10.1242/jcs.02275. PubMed PMID: 15827090.
4. Evans E, Yeung A. Apparent viscosity and cortical tension of blood granulocytes determined by micropipet aspiration. *Biophys J.* 1989;56(1):151-60. Epub 1989/07/01. doi: 10.1016/S0006-3495(89)82660-8. PubMed PMID: 2752085; PubMed Central PMCID: PMC1280460.
5. Tran-Son-Tay R, Needham D, Yeung A, Hochmuth RM. Time-dependent recovery of passive neutrophils after large deformation. *Biophys J.* 1991;60(4):856-66. Epub 1991/10/01. doi: 10.1016/S0006-3495(91)82119-1. PubMed PMID: 1742456; PubMed Central PMCID: PMC1260136.
6. Zhelev DV, Needham D, Hochmuth RM. Role of the membrane cortex in neutrophil deformation in small pipets. *Biophys J.* 1994;67(2):696-705. Epub 1994/08/01. doi: 10.1016/S0006-3495(94)80529-6. PubMed PMID: 7948682; PubMed Central PMCID: PMC1225412.
7. Cuvelier D, Thery M, Chu YS, Dufour S, Thiery JP, Bornens M, et al. The universal dynamics of cell spreading. *Curr Biol.* 2007;17(8):694-9. Epub 2007/03/24. doi: 10.1016/j.cub.2007.02.058. PubMed PMID: 17379524.
8. Sukumaran S, Seifert U. Influence of shear flow on vesicles near a wall: A numerical study. *Phys Rev E.* 2001;64(1). doi: ARTN 011916  
DOI 10.1103/PhysRevE.64.011916. PubMed PMID: WOS:000169907100090.
9. Etienne J, Duperray A. Initial dynamics of cell spreading are governed by dissipation in the actin cortex. *Biophys J.* 2011;101(3):611-21. Epub 2011/08/03. doi: 10.1016/j.bpj.2011.06.030. PubMed PMID: 21806929; PubMed Central PMCID: PMC3145312.
10. Parekh SH, Chaudhuri O, Theriot JA, Fletcher DA. Loading history determines the velocity of actin-network growth. *Nat Cell Biol.* 2005;7(12):1219-23. Epub 2005/11/22. doi: 10.1038/ncb1336. PubMed PMID: 16299496.
11. Marcy Y, Prost J, Carlier MF, Sykes C. Forces generated during actin-based propulsion: a direct measurement by micromanipulation. *Proc Natl Acad Sci U S A.* 2004;101(16):5992-7. Epub 2004/04/14. doi: 10.1073/pnas.0307704101. PubMed PMID: 15079054; PubMed Central PMCID: PMC395911.
